# Supplementary material for: Cross-scale causal information flow from El Niño Southern Oscillation to precipitation in eastern China
Source: Copernicus journal article supplement (doi:10.5194/egusphere-2024-400), 2024-02-27
Supplement: Supplementary file [file egusphere-2024-400-AC2-supplement.pdf]

# Response to Review # 1 for the manuscript: Cross-scale causal information flow from El Niño Southern Oscillation to precipitation in eastern China

Yasir Latif<sup>1</sup>, Kaiyu Fan<sup>2,3</sup>, Geli Wang<sup>2,\*</sup>, and Milan Paluš<sup>1,\*</sup>

<sup>1</sup>Department of Complex Systems, Institute of Computer Science of the Czech Academy of Sciences, 182 00 Prague 8, Czech Republic

<sup>2</sup>Key Laboratory for Middle Atmosphere and Global Environment Observation, Institute of Atmospheric Physics, Chinese Academy of Sciences, Beijing 100029, China

<sup>3</sup>Dalian Meteorological Bureau, Dalian 116001, China

\*Joint corresponding authors

**Correspondence:** Geli Wang (wgl@mail.iap.ac.cn) and Milan Paluš (mp@cs.cas.cz)

## Dear Editors & Reviewers,

We would like to thank the reviewers for careful reading and insightful comments which give us the opportunity to improve the manuscript. There were many suggestions to change the figures, including the scale for the precipitation maps. Therefore we present relevant (sub)figures in two different scales, blue and red-yellow (the original) and ask the reviewers and editors to advice which one to use. In order to avoid confusion, we use the same numbers of figures (2–10) as in the original submission. In a future revised manuscript the numbers of figures will be decreased by one, since the former Fig. 1 will be presented as Table 1, as requested by a reviewer.

In the following there are our answers to the comments of the Reviewer # 1. Reviewer's comments are in *blue italics*, while our answers in black roman font. If we cite a text from the manuscript, the changes are in **red color**.

*The authors present a statistical method to relate the NINO3.4 index to precipitation in Eastern China based on wavelet transform. The technique reveals a statistical relation to the phase of the quasi-biennial mode to the variability of the monsoon that suggest that there might be a physical mechanism linking the two. While the general idea of the paper seems clear to me, several details, especially related to figures and discussion are problematic and should be addressed before considering publication.*

We would like to thank the reviewer very much for the valuable comments. Our responses follow.

*1) Fig 1. Is rather a table more than a figure, and it would be better if it was considered so. Also, graphically, it makes no sense to have it as a low-resolution figure. Also, the colors do not provide any information. I suggest to re-elaborate it as a simple table. The first reference Yang et al. 2004 has a typo and, in the reference list, it has no year associated. I suggest the*

*authors to revise the other references as well.*

We have checked the references and created a table instead of Fig. 1, see below.

**Table 1. Short literature review.** Previous studies regarding the impact of ENSO on annual and seasonal precipitation in Chinese regions.  
\* Et: Evapotranspiration, Ppt: Precipitation, YRB: Yellow River Basin, YZRB: Yangtze River Basin, ERB: East River Basin

| Authors               | Region/study period | Variable       | Observation                                                   |
|-----------------------|---------------------|----------------|---------------------------------------------------------------|
| Yang et al., 2004     | YRB* (1951-2000)    | Ppt* and Et*   | Decreased Ppt and increased Et during 1990-2000               |
| Li and Zheng., 2013   | YRB (1951-2012)     | Ppt and ENSO   | Decadal weakening of autumn Ppt due to ENSO                   |
| Zhang et al., 2013    | ERB* (1956-2005)    | Ppt and ENSO   | Strong correlation between ENSO and April Ppt                 |
| Xiao et al., 2015     | YZRB* (1960-2019)   | Ppt and ENSO   | Strong relationship between ENSO and seasonal Ppt             |
| Zhang et al., 2016    | YZRB (1979-2015)    | Ppt and ENSO   | Dominant/predictable impact of ENSO on Asian Ppt              |
| Gao and Wang., 2017   | YRB (1960-2011)     | Extreme Ppt    | Weakening of summer monsoon                                   |
| Cao et al., 2017      | YZRB (1960-2015)    | Ppt and ENSO   | Strong ENSO impact on wetting and drying Ppt pattern          |
| Chang et al., 2017    | YRB (1956-2010)     | Ppt and runoff | Abrupt change in Ppt with insignificant trends at 8 stations  |
| Hardiman et al., 2018 | YZRB (1992-2015)    | Ppt and ENSO   | Linear impact of ENSO on summer Ppt                           |
| Lv et al., 2019       | China (1960-2013)   | Ppt and ENSO   | Decreased Ppt but increased extreme events attributed to ENSO |
| Liu et al., 2020      | YRB (1961-2017)     | Seasonal Ppt   | Linear impact of ENSO on winter and spring Ppt                |

*2) The term quasi-oscillatory, which is used very often, is unclear. What does that mean? It gives the idea that these components “almost oscillate”, however these components are wavelet projections so they oscillate by design. Do the authors mean quasiperiodic? This would be consistent with the use of wavelets, that have a narrow bandwidth in the Fourier space.*

The term “quasi-oscillatory” is typically used for the ENSO phenomenon as a whole, the reviewer is correct that for the wavelet components the term “quasi-periodic” would be more appropriate. We will reformulate the text accordingly.

*3) Data: the authors use ERA 5 reanalysis for the precipitation and analyze it to the single grid cell level. I think the authors should talk about the several limitations of reanalysis products for precipitation and why they believe that these limitations are not an obstacle for their study*

We will add a text:

Recently, some studies focused on comparing the performance of model-based precipitations such as ERA to satellite products for mainland Chinese regions and Tibetan Plateau, since reliable precipitation retrievals with fine spatiotemporal resolutions are vital in global and regional evaluations (Xu et al., 2022; Hu and Yuan, 2021). Model-based precipitation estimates, which are an essential alternative to satellite-based precipitation products, have grown rapidly in recent decades. Model-based products outperform satellite products in subregions of temperate monsoon climate (TM) and temperate continental climate

(TC) (Xu et al., 2022). However, when compared to gauge precipitation, ERA 5 performance was being compromised in terms of frequency and intensity for Tibetan Plateau (Hu and Yuan, 2021). The latter study further argued that rainfall gauges on the Tibetan Plateau are generally positioned in valleys and may not correctly reflect the region's average. Another study for the same regions of TP and Sichuan province observed that ERA-Interim exhibits better performance than IMERG\_E, IMERG\_L, IMERG\_F, CHIRPS, TRMM\_3B42, TRMM\_3B42RT (Lei et al., 2021). Future study will require additional observations and clarification of station locations and higher levels (Hu and Yuan, 2021). ERA 5 has replaced ERA- Interim and this release offers several improvements over the previous ERA-Interim reanalysis solution due to improved design and generation methodologies. In comparison to ERA-Interim, this dataset is more advanced due to several factors including a high resolution, day-by-day archiving, diverse data sources, better assimilation, and diversified data products (Tarek et al., 2020). The assessment at the monthly flood season (Lavers et al., 2022) indicates that the ERA5 is slightly better than the other models. It is better in the extratropics. ERA5 precipitation has been found to be a sufficiently excessive source of information in the non-tropical areas. Therefore, it is suggested that ERA5 be utilized primarily for extratropical precipitation monitoring. ERA5 performs spatially across China, with the highest correlation coefficient values in eastern, northwestern, and north China and the lowest biases in southeast China (our study area) (Jiao et al., 2021). Similarly, intensity comparisons show strong agreement between ERA-5 and EOBS in Germany, Ireland, Sweden, and Finland, but some disagreement in places with scarce input stations (Rivoire et al., 2021).

*4) Figure 4 is problematic because in NINO3.4, the 97-98 Niño should not be chopped. It has another, pointier shape. This should be true both using ERA5 and observations. That timeseries seems to be obtained with raw data rather than anomalies (and therefore should not be addressed as Nino3.4). What I mean is that the time series seems to be obtained averaging raw SST in the Nino3.4 area, and afterwards normalized to 0 mean (and 1 variance?). It should be explained in the text and, if so, not referred to as NINO3.4 index. Moreover, it is not clear how the Niño and Niña events are defined, if using this time-series or if they were taken from some other source. If they are taken from this timeseries, then most likely they are not 100right.*

The used ENSO data are described, including URL addresses from where they were downloaded, in Sec. **2.4 ENSO data**. This section also defines ENSO states ENSO+ (El Niño), ENSO- (La Niña) and ENSO0 (neutral). The referee is correct, however, that the data presented in the original form of Fig. 4 was normalized “raw”, i.e., not anomalized data marked as Nino3.4 at <https://www.cpc.ncep.noaa.gov/data/indices/ersst5.nino.mth.91-20.ascii>. For better understanding of the definition of the ENSO states, in the new version of the Figure 4a we present anomalized Nino3.4 data as well as the ONI index used for the states definition. We present the new version of Fig. 4 below.

*5) It is unclear what the panel d) is representing, the main text reads “the causal influence of the phase of the 6-year component obtained from the Niño3,4 time series, on the precipitation amplitude for the variability in the quasi-biennial scale”. So the second part of the sentence is unclear, what is the “precipitation amplitude. . . quasibiennial scale”? Why isn't the precipitation index used again as in the previous case? It would have been more consistent. Also, it is not clear here how the*

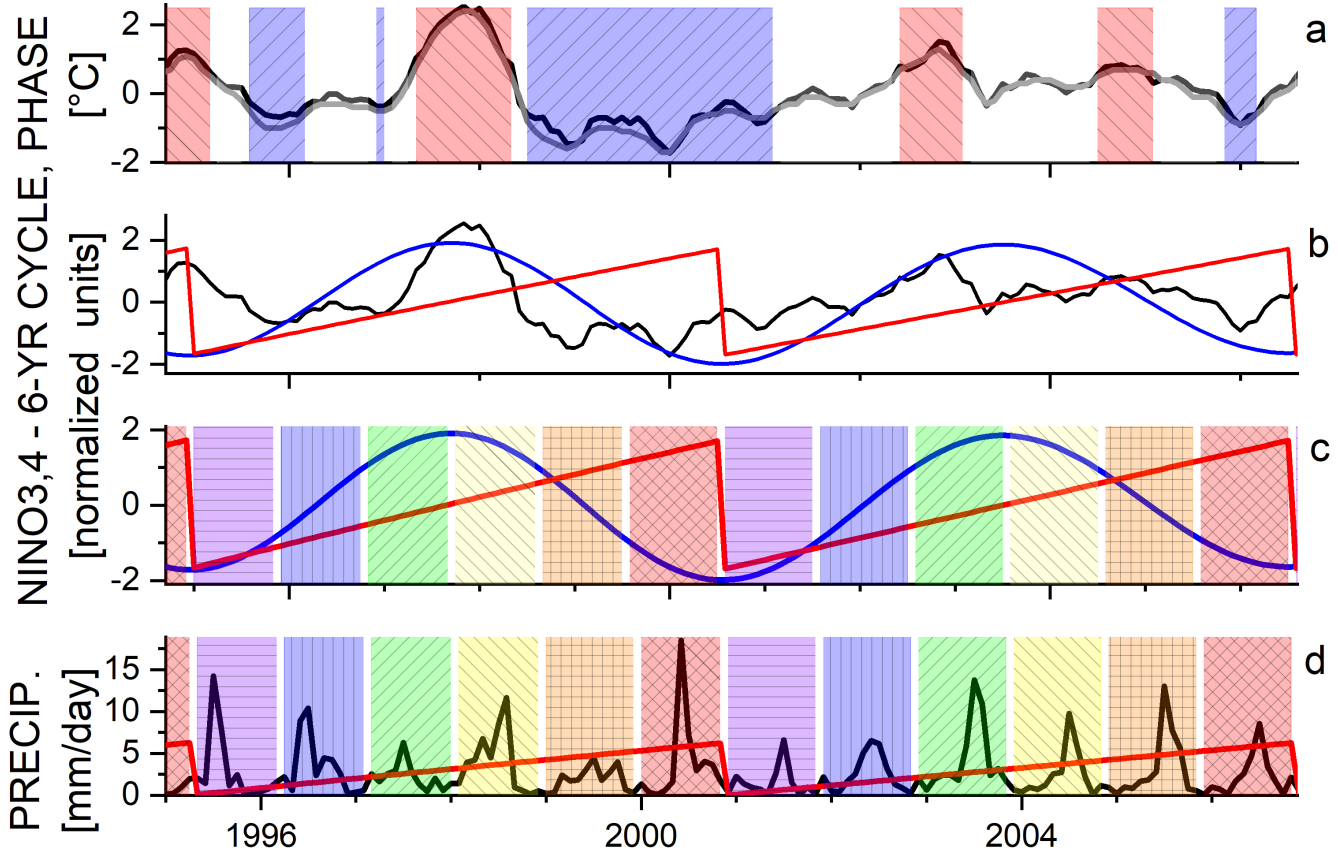

**Figure 4. ENSO states and binning of the low-frequency cycle.** From top to bottom: (a) A segment of anomalized Niño3.4 (black) and ONI (gray) time series with marked ENSO states: warm episodes ENSO+ (light red), cold episodes ENSO- (light blue) and neutral ENSO0 state (white). (b) The same segment of anomalized Niño3.4 time series (black) with its CCWT-extracted 6-yr component (blue) and the instantaneous phase (red) of the latter. (c) The 6-yr Niño3.4 component (blue) and its instantaneous phase (red). The bars of different colors and patterns mark the 6 phase bins into which each 6-yr cycle is divided. (d) A segment of reanalysis precipitation data from the gridpoint 33.75°N 115.75°E (black) and the 4 months lagged phase (red) of the 6-yr Niño3.4 cycle and related phase bins (bars of different colors and patterns) in which the precipitation conditional means are computed.

*surrogates are computed, are they time-shift surrogates of the Niño3.4 or of the phases timeseries? I think the only reasonable choice is the first (if it does not produce abrupt discontinuities) because the latter for sure produces an abrupt discontinuity so wouldn't be a good surrogate at all for the phases time series.*

For better understanding, we extend the text as follows:

Computing the conditional means, the precipitation time series is not exactly aligned in time with the ENSO states or the ENSO phase bins, since the causal effect of ENSO can occur with some time delay. The causal delay can be found in the causality analysis **as follows**: In Fig. 5a the conditional mutual information represents the causal influence of ENSO states on

the precipitation (EASMI-ZQY index). It was computed using the Wibral et al. (2013) formula 9 in which  $x(t)$  is a discrete 3-valued function of the ENSO states,  $y(t)$  is the precipitation EASMI-ZQY index discretized into four bins using the equi-quantal binning algorithm (Paluš and Vejmelka, 2007),  $d_2 = 1$ .

.....

Fig. 5d shows the conditional mutual information showing the causal influence of the phase of the 6-year component obtained from the Niño3,4 time series, on the precipitation amplitude for the variability in the quasi-biennial scale (blue). It was again computed using the Wibral et al. (2013) formula 9, however, since the cross-scale causality is evaluated, before applying Eq. 9, the Niño3.4 and precipitation data underwent CCWT and now  $x(t)$  is the ENSO phase  $\phi_f(t)$  for the frequency  $f$  related to the period 6 years and  $y(t)$  is the precipitation amplitude  $A_f(t)$  for the frequency  $f$  related to the period 2 years.  $d_2 = 3$  and the Gaussian estimator (Paluš, 2014) is used. It is evident again that there is no significant causality from the precipitation to the ENSO phase shown by the black dashed line. However, the influence of the ENSO phase on the amplitude of precipitation exhibits a clear significant peak in approximately four months (lags 2-6 months). Therefore, for the calculation of conditional means for the six phase bins, we used the ENSO phase bins having the time shift of four months back relative to precipitation data.

Considering the use of the surrogate data, the sec. **2.7 Surrogate data for statistical testing** will be extended by the sentence:

In the cross-scale analyses, the surrogate data are applied directly to the raw data before the application of the wavelet transform.

*6) Fig. 5 panels b) and e) are very confusing and misleading. The broken vertical axes hide the fact that the values are indeed very similar. The black and red bars to represent the differences make no sense to me, and perhaps those figures are not needed at all, and a table would be more readable. The label of panels c) and f) reports "histogram" which is rather odd, also because the figure does not look like an histogram. Regarding to this part, the value 0.264 is reported as significant in the text but the p-value is not given. Moreover, it should be probably be corrected (something like a Bonferroni correction) as here the authors are testing multiple differences, implicitly,  $5 * 6 / 2$  differences.*

The panels 5b and 5e are used to explain the evaluation of the differences between the conditional means. We compute differences between all conditional means in order to find their maximum, we plot, for illustration, differences of the adjacent bins. In the case of 5e, the differences of the adjacent bins have also another meaning – they represent the amplitude of the quasi-biennial cycle in the precipitation which is modulated by the ENSO low-frequency mode. This phenomenon is more discussed in Fig. 10.

Panels c) and f) indeed include histograms as estimators of surrogate data distributions. In f, the data value 0.264 lies almost outside the distribution of the surrogate data (the null hypothesis), it is the essence of statistical significance. In fact, it touches the most right bin whose value is 0.006, thus this is the estimate of p-value. Using a finer histogram we could get 0.003 or less, the value is not so important as the position relative to the distribution of the null hypothesis. We test only the maximum

difference, thus here it is a single test. (Maximum is taken from the data, and maxima are taken from all surrogate realizations.)

*7) Fig. 8c is either worrying or I didn't understand what it represents. The space is supposed to be divided in a regular grid representing ERA5 grid cells. Then, in each grid cell, rainfall data is analyzed and the ENSO state when the peak precipitation occurs most often marks the cell color. If so, why the blue squares do not fit the grid? How have they been obtained? The situation in Fig. 9 is even worse.*

We are sorry for this misunderstanding. The grids in the plots are not the grids of ERA5. The grids which appeared in the first versions of figures were used to avoid interpolating of the mapped values. While mapping precipitation values, the interpolation has a physical sense, in mapping extrema occurrence in bins 1–6 we need to have only integer values, while interpolation does not have any sense. In the new version of figures we made the maps in a different way and the misleading grids did not appear. See the new versions of figures bellow.

*8) Fig. 10. What I said for Fig. 5 panels b) and e) holds here too.*

Here, as in the case of Fig. 5e, the conditional means demonstrated the alternation of weak and strong monsoon years (the influence of the ENSO quasibiennial cycle), and the differences of the adjacent bins represent the amplitude of the quasibiennial cycle in the precipitation which is modulated by the ENSO low-frequency mode.

*9) "Although physical mechanisms explaining the observed cross-scale information transfers are yet to be established, the uncovered causal relations can already be used in machine learning tools for forecasting precipitation anomalies." I think that the first sentence should be expanded. The authors should provide an idea for further investigations of what could be a possible mechanism that makes the low frequency of ENSO impact the monsoon at the 2ys scale, referring to the literature that surely has already investigated the link between ENSO and China monsoon from another angle. The second sentence is very vague and does not provide any valuable information.*

This sentence should not be taken out of context of the concluding paragraph, which we would like to extend by other relevant references as:

The fact that complex evolution of climate, atmosphere, or circulation regimes is influenced by interactions of dynamics on multiple time scales is known (Muñoz et al., 2017; Zhang et al., 2023). For instance, Muñoz et al. (2015) suggest that cross-time scale interactions between different climate drivers improves the predictive skill of extreme precipitation. Hsu et al. (2023) show that multiscale interactions, in particular, scale interactions between the monsoon mean field, two modes of intraseasonal oscillation, and synoptic disturbances, were driving the devastating floods in Henan Province, China during July 2021. Liu et al. (2023) used the multiscale window transform (MWT) and MWT-based energy and vorticity analysis (MS-EVA), to identify

three scales fields: basic-flow fields (>64 days), intraseasonal oscillation fields (8–64 days) and synoptic-scale-eddy fields (<8 days), responsible for the torrential rainfall event, which hit Zhengzhou on July 20, 2021. Ungerovich et al. (2023) emphasize the role of the large scale circulation anomalies associated with ENSO teleconnections in simulation of extreme rainfall events in Uruguay, while Pineda et al. (2023) suggest that the early onset of heavy rainfall on the northern coast of Ecuador in the aftermath of El Niño 2015/2016 was favored by the convective environment in late January due to cross-time-scale interference of the very strong El Niño event and a strong and persistent Madden-Julian oscillation. The presented research, however, is a first step in developing a methodology able to establish a solid statistical evidence for existence of cross-scale causal interactions and to estimate their effect in measurable, physical quantities. In particular, the results presented here can open a new direction in understanding and predicting precipitation anomalies in eastern Asia. Although physical mechanisms explaining the observed cross-scale information transfers are yet to be established, the uncovered causal relations can already be used in statistical or machine learning tools for forecasting precipitation anomalies. In related considerations, Muñoz et al. (2023) propose to find “Windows of Opportunity” in forecasts across timescales by combining wavelet spectral analysis and a non-stationary time-frequency causality analysis. Materia et al. (2024) try to understand the causal factors behind these windows of opportunity using Liang-Kleeman information flow (Liang, 2013). This study demonstrates the ability to identify sources of cross-scale predictability by using complex continuous wavelet transform and information-theoretic approach to causality (Paluš, 2014).

*10) If the QB mode is the one that impacts the dataset the most why, to make all figures up to Fig 5, it was used the 6ys mode instead?*

We report that the effects of both QB and LF modes are important. Using the six bins of the LF phase, both effects are apparent, as described in the paper. Focusing on the QB mode alone, one would effectively average all even and odd bins and the LF mode would attenuate the effect of the QB mode. The present methodology estimates the combined effect of both modes. In principle we could distinguish, in each grid point, which mode has a stronger effect. We are afraid, however, that the manuscript is already very complex to understand, so that we leave such distinction for further research.

*Minor:*

*The sentence “other recent follow-up studies were particularly concerned with the predictability and future of ENSO projections attributable to global to regional scale interconnections, including the combined influence of ENSO and PDO” is unclear.*

Reformulation: Other recent studies considered combined influence of ENSO and NAO or PDO and future ENSO projections.

*“The Yangtze River is China’s longest river and the world’s third largest, contributes considerably to China’s equitable economic and ecological growth”, I understand economic growth but what does ecological growth mean?*

The ecological growth of the Yangtze River Basin refers to the development and changes in its ecosystems over time, influenced by both natural processes and human activities. The Yangtze River Basin has undergone significant ecological changes due to various factors such as climate, geography, and human impact. The basin’s high, middle, and lower portions have various climates and geomorphology, which contribute to its great biodiversity and huge number of uncommon and unique species (Chen, 2020). Therefore, its ecological growth is as important as economic growth.

*“The YZRB is predominantly controlled by Siberian northwest winter and southeast summer monsoon.” Written like this it suggests the existence of a Siberian monsoon. Perhaps the authors are mentioning the Siberian High?*

The YZRB is predominantly controlled by Siberian northwest winter and southeast summer monsoon. This monsoon brings cold, dry air from Siberia during the winter months. It has the potential to diminish temperatures and precipitation, resulting in drought conditions in certain areas of the basin (Yang et al., 2023).

*Fig. 2 carries almost no information. In the text, a lot of geographical details are given “hydrological station (YHS) separates the Yangtze River into upper and lower sections and is renowned as the ‘Gateway to the Three Gorges’. The Three Gorges Dam (TGD) lies just approximately 40 kilometers above (Xu et al., 2007). The territory above Yichang station is commonly regarded as the upper sub-basin of the YZRB; the region from Yichang station and Hukou station is the middle sub-basin; and the region under Hukou station is the lower sub-basin of the YZRB (Fang et al., 2018). The YZRB lies in subtropical and temperate climate zone dominated by monsoonal winds; the southern region exhibits subtropical climate while northern region presents temperate zone. Major flooding in YZRB is linked with warm ENSO and strong summer monsoons typically occur after El Niño conditions in the winter, while weak winter” which are impossible to locate in the maps, making both the map and this paragraph useless.*

Thank you for raising this critical issue with Fig. 2. The Referee #2 was more concerned about the lack of an orographic height color bar, and also proposed including the location of the local precipitation stations mentioned in the paper. As a result, we updated the orographic color bar height and mentioned the position of the color bar of local precipitation stations, as seen in the following new version of Fig.2

We will remove the unnecessary information as per your suggestion.



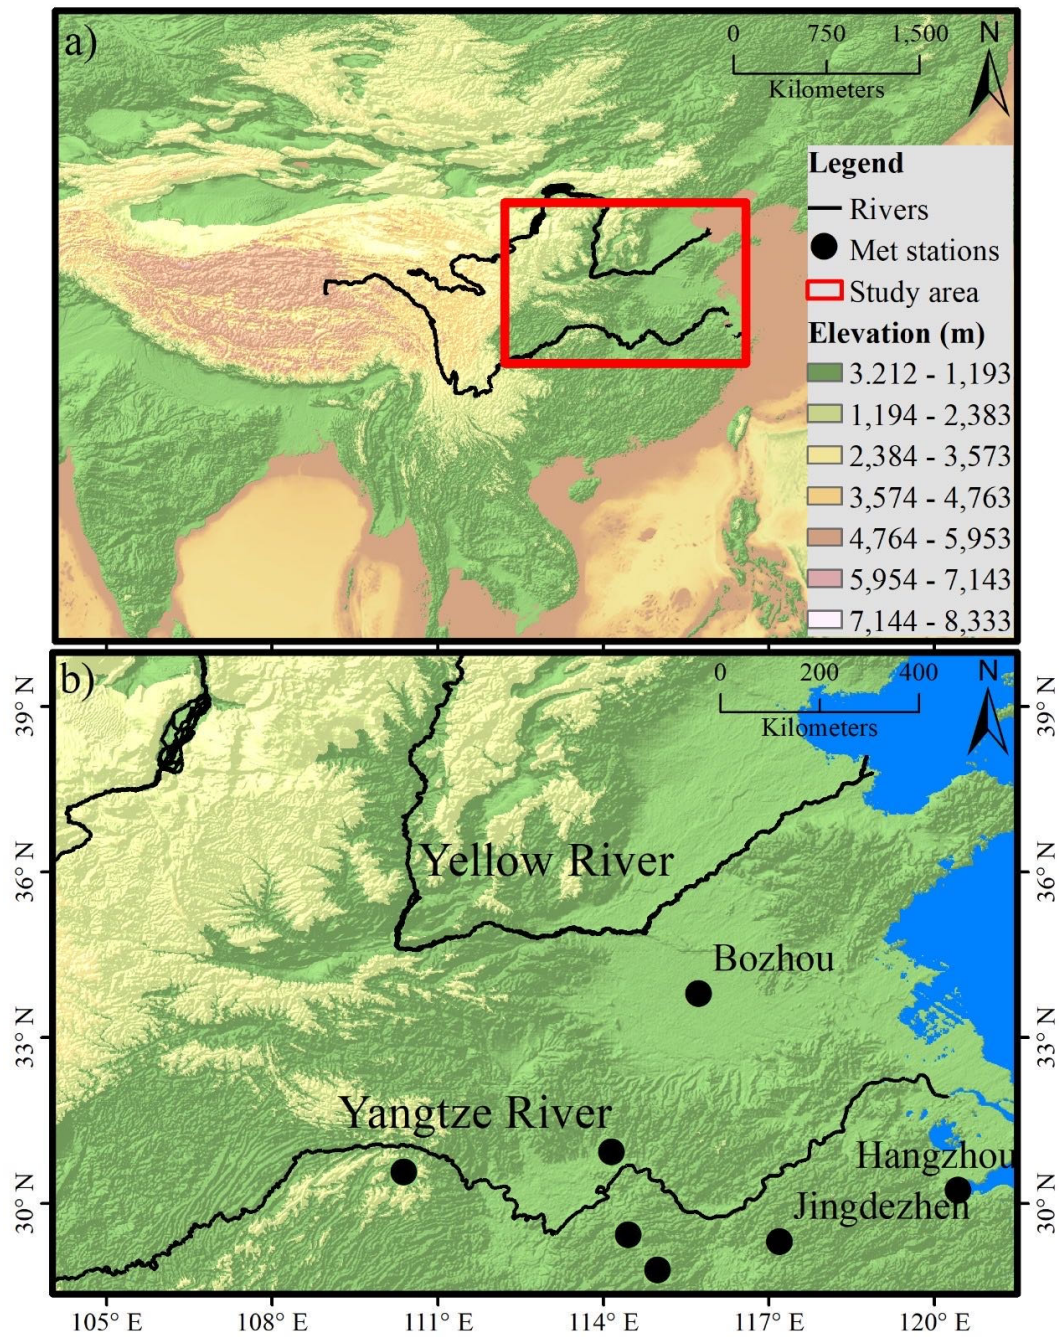

**Figure 2. Study area.** (Top) Localization of the selected region in Yangtze and Yellow River Basins. (Bottom) Study area in a detailed view, including the positions of selected stations.

*Fig 3. To use red for precipitation is a semiotically unfortunate choice. Moreover, one cannot see the rivers.*

We have changed the color for the rivers. We understand that semiotically better choice for precipitation would be a blue color scale. We have remade relevant figures in a blue scale, however, it seems that the red-yellow scale is better readable. We decided to present both versions of the figures and ask referees and editors to advice which to use.

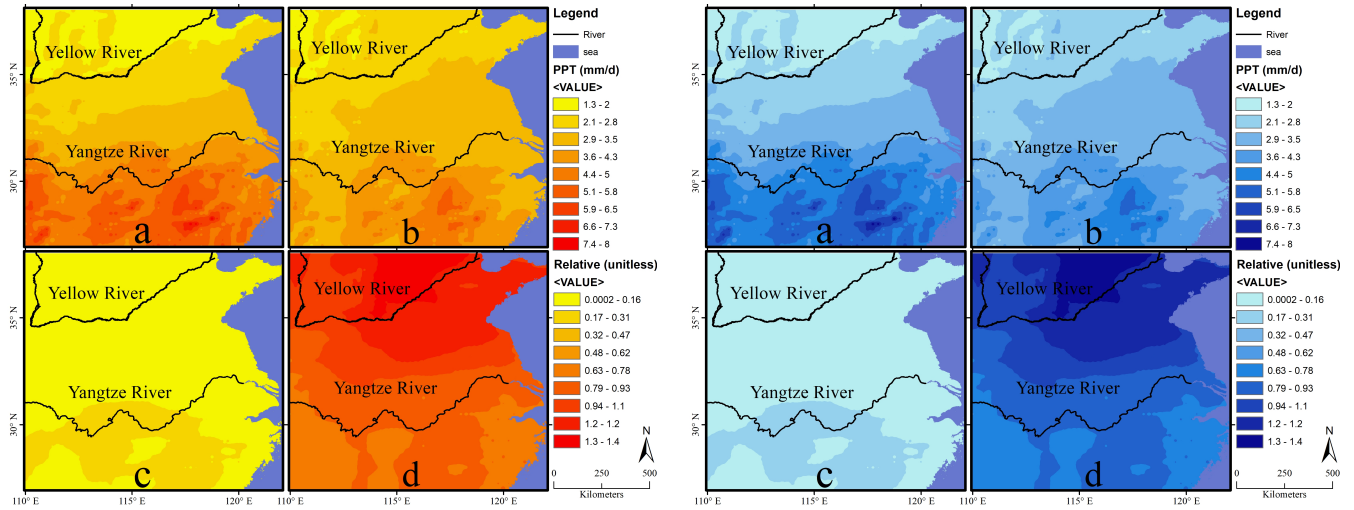

**Figure 3. Precipitation and its variability in the study area.** Spatial distribution of precipitation and its variability during 1951-2020; (a) mean precipitation, (b) precipitation standard deviation (SD), (c) relative difference between ENSO positive and ENSO neutral state, (d) relative precipitation SD (SD/mean precipitation).

*Eq.1 Exp parenthesis is too small*

The equation

$$\psi(t) = \frac{1}{\sqrt{2\pi\sigma_t^2}} \exp\left(-\frac{t^2}{2\sigma_t^2}\right) \exp(2\pi if), \quad 1$$

will be changed to

$$\psi(t) = \frac{1}{\sqrt{2\pi\sigma_t^2}} \exp\left(-\frac{t^2}{2\sigma_t^2}\right) \exp(2\pi ift), \quad 1$$

*The sentence “The causal delay can be found in the causality analysis” in that part of the text is particularly unclear.*

The sentence “The causal delay can be found in the causality analysis.” will be extended as “The causal delay can be found in the causality analysis **as follows:**”

The text which followed this sentence explains the finding of causal delay: “In Fig. 5a the conditional mutual information represents the causal influence of ENSO states on the precipitation (EASMI-ZQY index). .... the influence of ENSO exhibits a significant peak for the time lag of 6 months.”

*Nino3.4 sometimes is written with (often in the text) and sometimes not (e.g. label of fig.4). The authors should be consistent: either with or without. Sometimes, it is written with a coma (“Nino3,4”) the point should be employed instead.*

We will unify all occurrences using Niño3.4.

*In Fig5. The panels would benefit of some labels.*

A label for causal directions added, see below.

*Fig. 6 Time unit of measure should be years, plural, not year. The colorbar needs a label*

Modified as recommended, see below.

*Fig 7. “a)”, “b)”, “c)” and “d)” are barely visible as the rivers and their names. The crosses hide the information about the difference patterns because they are too heavy.*

See new versions below.

*Fig. 8. And 9. Using the same color scale for maximum and minimum precipitation makes very hard to see any differences between the two maps (especially in 8), aside the mean level. Again, rivers colors are unfortunate. “c)” and “d)” labels are barely visible. In fig 9 the color scale of the legend of c and d should be periodic, as the numbers from 1 to 6 represent phases of the 6ys mode, so close numbers should have “close” colors and 1 and 6 should be regarded as close among them.*

See new version below.

*Fig. 10 Labels are oversized compared to panels, a line break or a smaller character dimension should be used.*

See the new version of the Fig. 10.

*In the sentence “for example, in neuroscience, where cross-frequency phase–amplitude coupling has recently been observed in electrophysiological signals reflecting the brain dynamics”, I think that mentioning neurosciences here is really out of con-*

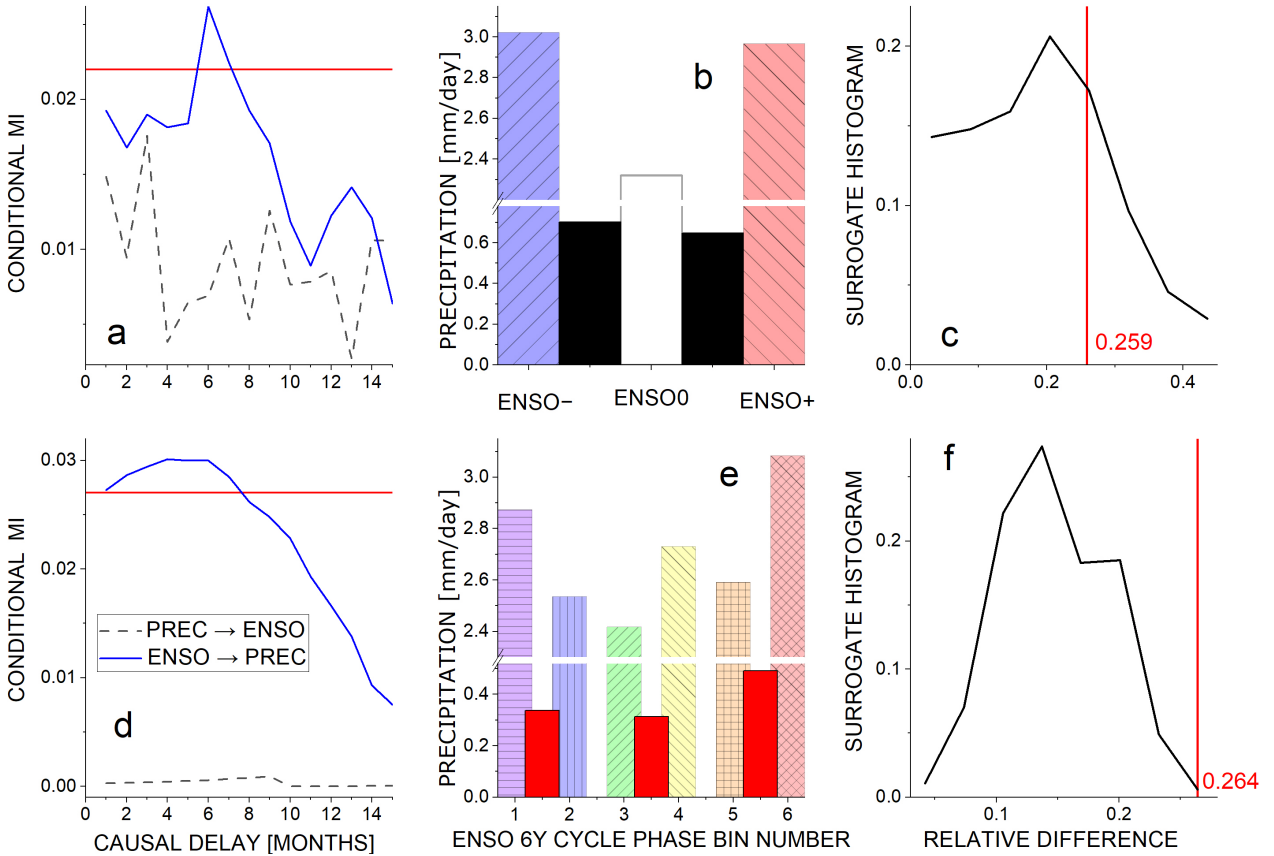

**Figure 5. Causal mechanisms and their effects.** (a) Conditional mutual information measuring the causal influence of ENSO states on precipitation characterized by the EASMI-ZQY index (solid blue line) and causality in the opposite direction (dashed black line). The red line is the significance threshold given as the mean+2SD for the surrogate data. (b) Conditional means for the precipitation data from the gridpoint 33.75°N 115.75°E for different ENSO states (ENSO- light-blue, ENSO0 white, ENSO+ light-red) computed for the lag of 6 months. Differences of the adjacent states in black. (c) Evaluation of statistical significance of the maximum relative difference between states, here ENSO- and ENSO0 (red vertical line) using the histogram for the surrogate data (black), (d) Conditional mutual information measuring the causal influence of ENSO 6yr cycle phase on 2yr cycle amplitude for precipitation characterized by the EASMI-ZQY index (solid blue line) and causality in the opposite direction (dashed black line). The red line is the significance threshold given as the mean+2SD for the surrogate data. (e) Conditional means for the precipitation data from the gridpoint 33.75°N 115.75°E for the 6 phase bins within the ENSO 6yr cycle (various colors). Differences of adjacent bins (red) considered as the amplitude of the precipitation quasibiennial cycle. The effect of the 6yr cycle phase is estimated as the maximum difference of the bin values – here the difference between the values of the 6th (orange) and the 3rd (yellow) bins. This value relative to the total precipitation mean is 0.264 and is marked by red vertical line in (f) and found statistically significant in comparison with the surrogate histogram (black).

*text given the journal.*

There are surprisingly many mathematical and data processing methods which have found applications in Earth sciences, neuroscience and other research areas. Besides cross-scale causality and general causality inference methods, we can name various forms of principal or independent component analysis and other dimension reduction methods, complex networks and

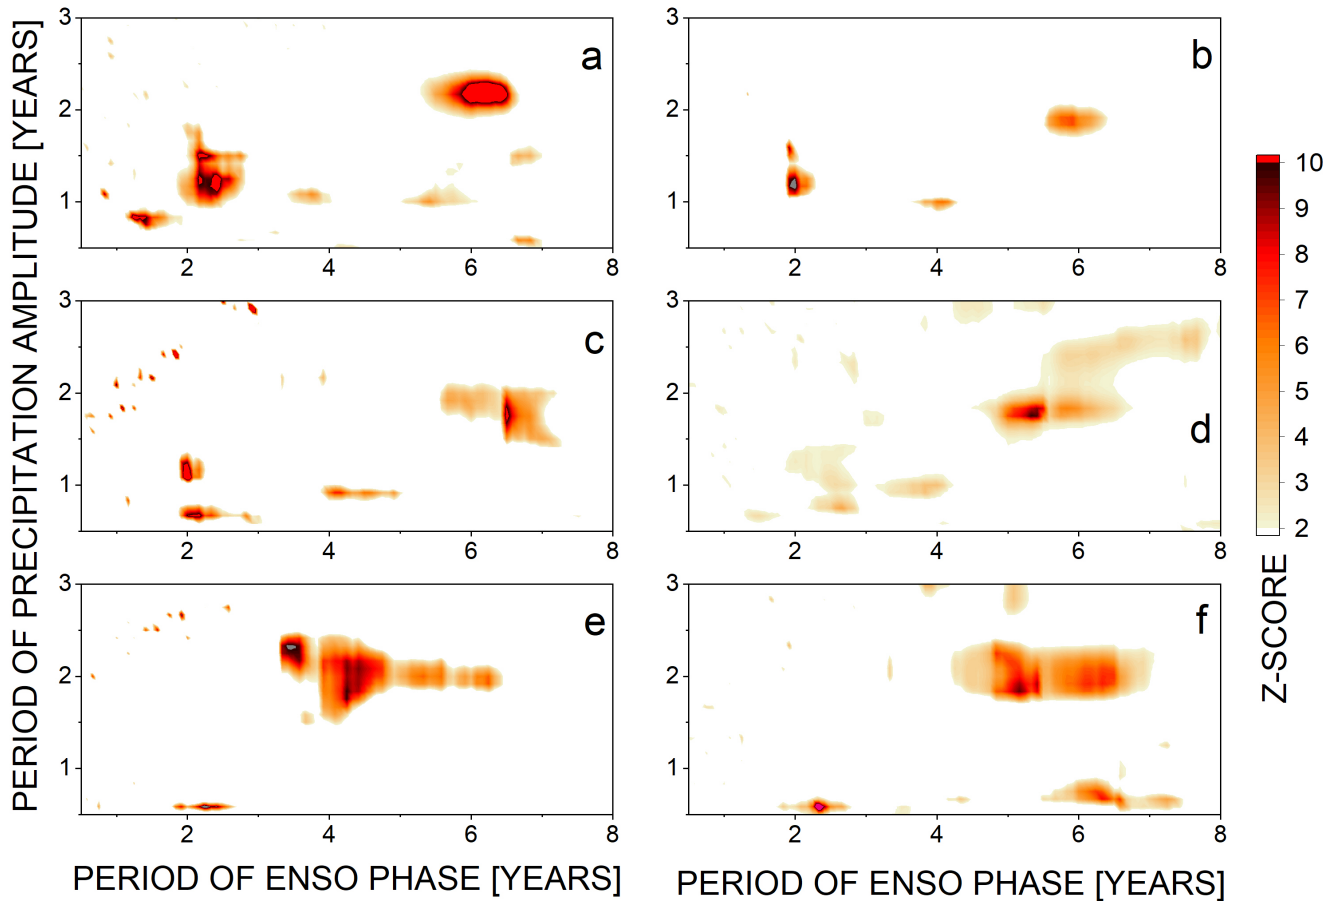

**Figure 6. Cross-scale ENSO influence on precipitation in eastern China.** Cross-scale phase-amplitude information transfer characterizing the causal influence of the phase of ENSO quasioscillatory components, with periods given on the abscissa, on the amplitude of precipitation quasioscillatory components with periods given on the ordinate. Significant causal influence of ENSO detected in (a) EASMI-ZQY index, (b) precipitation data from 6 stations from Hu Bei, Jiang Xi and Zhejiang provinces (averaged results), (c) precipitation data from station 58457 Hangzhou from Zhejiang province, (d) precipitation data from station 58527 Jingdezhen from Jiangxi province, (e) precipitation data from 58102 Bozhou station from An Hui province, (f) ERA 5 reanalysis precipitation data from the gridpoint 33.75°N 115.75°E. The colour codes present the conditional mutual information  $Z$ -score for  $Z > 2$ , obtained in the test using 100 realizations of surrogate data.

graph-theoretical approaches. For readers seeking a deeper understanding of the method, such an excursion into methodological papers in neuroscience can be useful and inspirational.

We would like to thank again the reviewer for the suggestions which helped us to improve the manuscript.

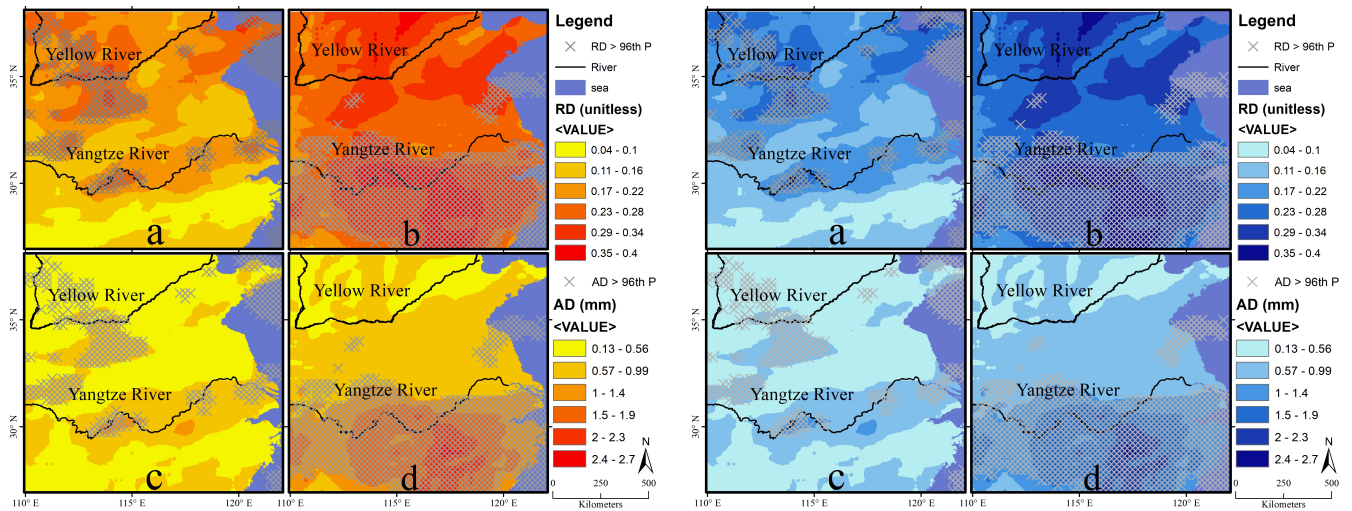

**Figure 7. Quantification of the effects of two causal mechanisms.** Relative (a, b) and absolute (c, d) maximum differences of precipitation conditional means: (a, c) conditioning on the six phase bins, i.e., the effect of the phase of the low-frequency ENSO component on precipitation; and (b, d) conditioning on the three ENSO states, i.e., the effect of the ENSO amplitude on precipitation. Statistically significant differences marked by X.

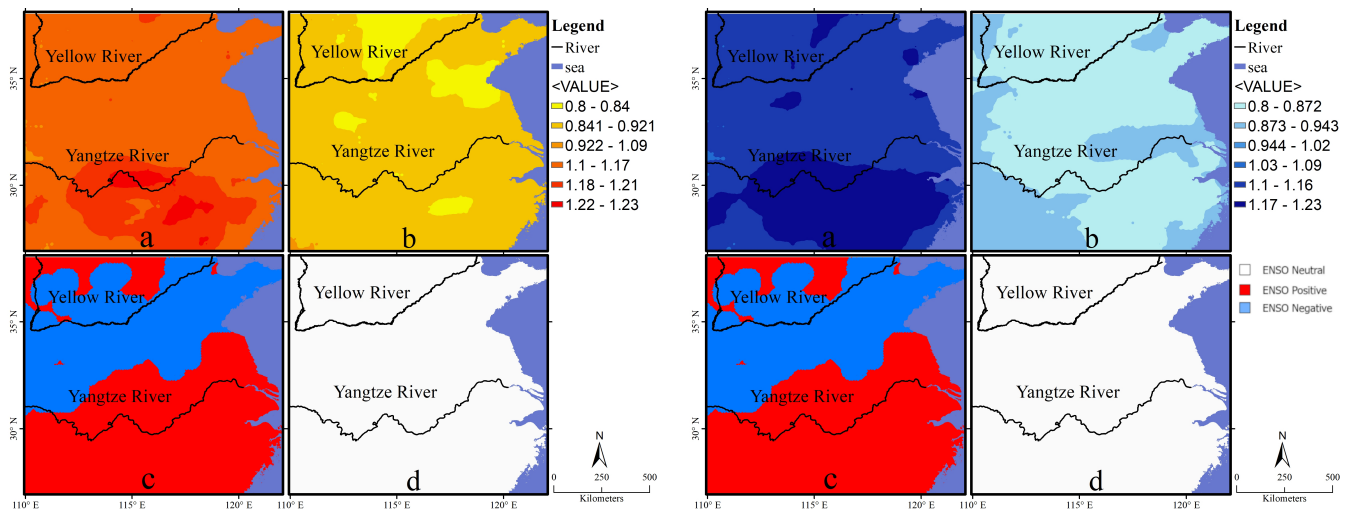

**Figure 8. Geography of ENSO amplitude influence.** Maximum and minimum precipitation values in ENSO states; (a) maximum precipitation value, (b) minimum precipitation value, (c) ENSO state in which maximum precipitation occurs, (d) ENSO state in which minimum precipitation occurs.

## References

Chen, J.: Ecosystem of the Yangtze River Basin, pp. 163–220, Springer Singapore, Singapore, ISBN 978-981-13-7872-0, [https://doi.org/10.1007/978-981-13-7872-0\\_4](https://doi.org/10.1007/978-981-13-7872-0_4), 2020.

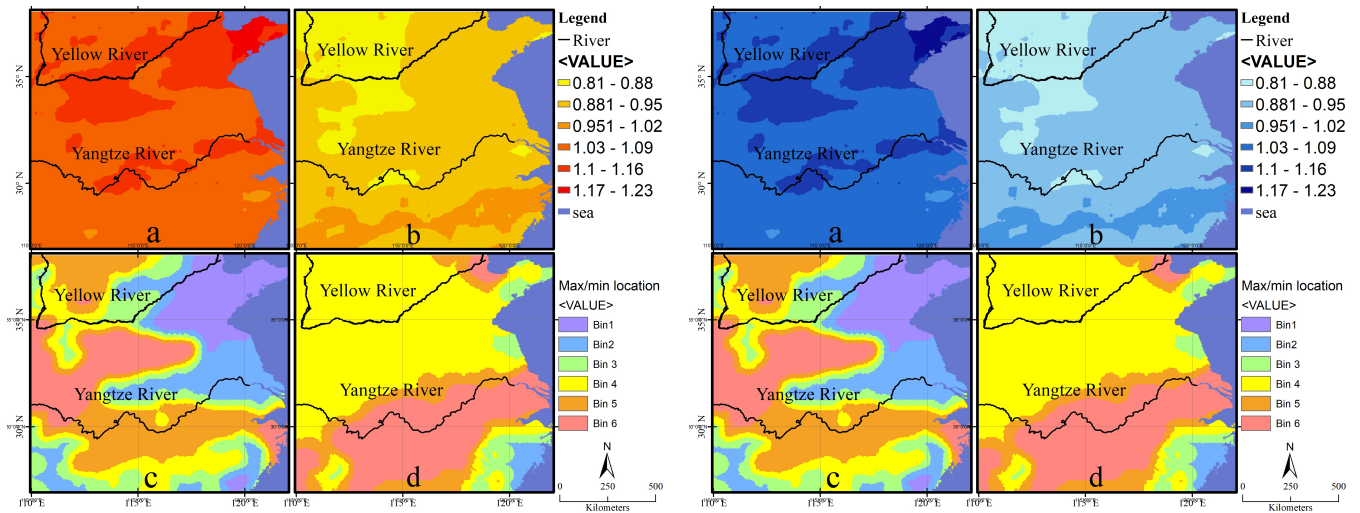

**Figure 9. Geography of ENSO phase influence.** Maximum and minimum precipitation values in the six phase bins, given by the low-frequency ENSO phase; (a) maximum precipitation value, (b) minimum precipitation value, (c) ENSO phase bin in which maximum precipitation occurs, (d) ENSO phase bin in which minimum precipitation occurs.

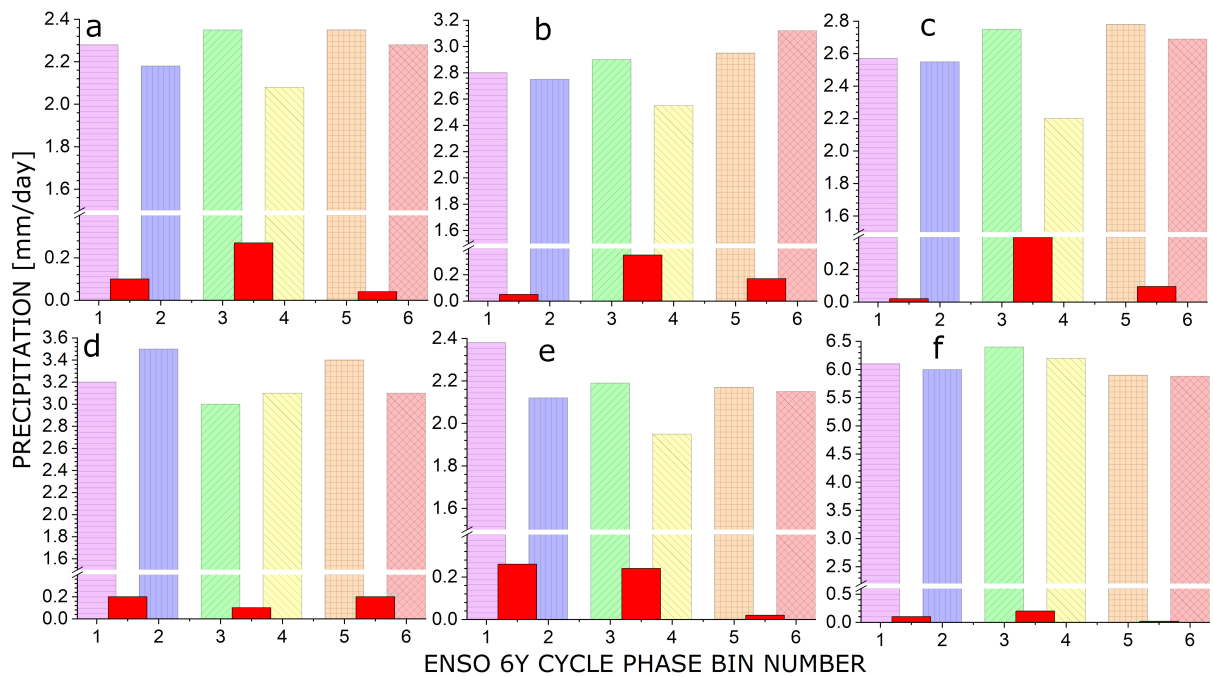

**Figure 10. Local ENSO phase effects.** Precipitation conditional means in the 6 ENSO phase bins at various coordinates: (a) 36°N 110°E, (b) 33°N 114°E, (c) 36°N 111°E, (d) 33°N 120°E, (e) 36°N 117°E, (f) 28°N 117°E. Red color represents difference between two adjacent bins.

- Hsu, P.-C., Xie, J., Lee, J.-Y., Zhu, Z., Li, Y., Chen, B., and Zhang, S.: Multiscale interactions driving the devastating floods in Henan Province, China during July 2021, *Weather and Climate Extremes*, 39, 100541, <https://doi.org/https://doi.org/10.1016/j.wace.2022.100541>, 2023.
- Hu, X. and Yuan, W.: Evaluation of ERA5 precipitation over the eastern periphery of the Tibetan plateau from the perspective of regional rainfall events, *International Journal of Climatology*, 41, 2625–2637, <https://doi.org/https://doi.org/10.1002/joc.6980>, 2021.
- Jiao, D., Xu, N., Yang, F., and Xu, K.: Evaluation of spatial-temporal variation performance of ERA5 precipitation data in China, *Scientific Reports*, 11, 17956, 2021.
- Lavers, D., Simmons, A., Vamborg, F., and Rodwell, M.: An evaluation of ERA5 precipitation for climate monitoring, *Quarterly Journal of the Royal Meteorological Society*, <https://doi.org/10.1002/qj.4351>, 2022.
- Lei, H., Li, H., Zhao, H., Ao, T., and Li, X.: Comprehensive evaluation of satellite and reanalysis precipitation products over the eastern Tibetan plateau characterized by a high diversity of topographies, *Atmospheric Research*, 259, 105661, <https://doi.org/https://doi.org/10.1016/j.atmosres.2021.105661>, 2021.
- Liang, X. S.: The Liang-Kleeman Information Flow: Theory and Applications, *Entropy*, 15, 327–360, <https://doi.org/10.3390/e15010327>, 2013.
- Liu, J., Tao, L., and Yang, Y.: Dynamical analysis of multi-scale interaction during the “21-7” persistent rainstorm in Henan, *Atmospheric Research*, 292, 106857, <https://doi.org/https://doi.org/10.1016/j.atmosres.2023.106857>, 2023.
- Materia, S., Ardilouze, C., and Muñoz, Á. G.: Deciphering Prediction Windows of Opportunity: A Cross Time-Scale Causality Framework, in: EGU General Assembly Conference Abstracts, pp. EGU24–18766, 2024.
- Muñoz, A. G., Goddard, L., Robertson, A. W., Kushnir, Y., and Baethgen, W.: Cross-Time Scale Interactions and Rainfall Extreme Events in Southeastern South America for the Austral Summer. Part I: Potential Predictors, *Journal of Climate*, 28, 7894 – 7913, <https://doi.org/10.1175/JCLI-D-14-00693.1>, 2015.
- Muñoz, A. G., Yang, X., Vecchi, G. A., Robertson, A. W., and Cooke, W. F.: A Weather-Type-Based Cross-Time-Scale Diagnostic Framework for Coupled Circulation Models, *J. Climate*, 30, 8951 – 8972, <https://doi.org/10.1175/JCLI-D-17-0115.1>, 2017.
- Muñoz, Á. G., Doblas-Reyes, F., DiSera, L., Donat, M., González-Reviriego, N., Soret, A., Terrado, M., and Torralba, V.: Hunting for “Windows of Opportunity” in Forecasts Across Timescales? Cross it, in: EGU General Assembly Conference Abstracts, pp. EGU23–15594, 2023.
- Paluš, M.: Cross-scale interactions and information transfer, *Entropy*, 16, 5263–5289, <https://doi.org/10.3390/e16105263>, 2014.
- Paluš, M.: Multiscale Atmospheric Dynamics: Cross-Frequency Phase-Amplitude Coupling in the Air Temperature, *Phys. Rev. Lett.*, 112, 078702, <https://doi.org/10.1103/PhysRevLett.112.078702>, 2014.
- Pineda, L. E., Changoluisa, J. A., and Muñoz, A. G.: Early onset of heavy rainfall on the northern coast of Ecuador in the aftermath of El Niño 2015/2016, *Frontiers in Earth Science*, 11, <https://doi.org/10.3389/feart.2023.1027609>, 2023.
- Rivoire, P., Martius, O., and Naveau, P.: A Comparison of Moderate and Extreme ERA-5 Daily Precipitation With Two Observational Data Sets, *Earth and Space Science*, 8, e2020EA001633, <https://doi.org/https://doi.org/10.1029/2020EA001633>, e2020EA001633 2020EA001633, 2021.
- Tarek, M., Brissette, F. P., and Arsenaault, R.: Evaluation of the ERA5 reanalysis as a potential reference dataset for hydrological modelling over North America, *Hydrology and Earth System Sciences*, 24, 2527–2544, <https://doi.org/10.5194/hess-24-2527-2020>, 2020.
- Ungerovich, M., Barreiro, M., and Kalemkerian, J.: Simulation of extreme rainfall events in Uruguay: Role of initialization and large scale dynamics, *Atmospheric Research*, 292, 106842, <https://doi.org/https://doi.org/10.1016/j.atmosres.2023.106842>, 2023.



- Xu, J., Ma, Z., Yan, S., and Peng, J.: Do ERA5 and ERA5-land precipitation estimates outperform satellite-based precipitation products? A comprehensive comparison between state-of-the-art model-based and satellite-based precipitation products over mainland China, *Journal of Hydrology*, 605, 127–353, <https://doi.org/https://doi.org/10.1016/j.jhydrol.2021.127353>, 2022.
- Yang, P., Zhang, Y., Li, J., Xia, J., Huang, H., and Zhu, Y.: Characterization of precipitation and temperature equilibrium and its driving forces in the Yangtze river basin under climate change, *Climate Dynamics*, 61, 5861–5873, 2023.
- Zhang, Q., Zhang, Y., and Wu, Z.: Multiple time scales of the southern annular mode, *Climate Dynamics*, 61, 1–18, <https://doi.org/10.1007/s00382-022-06476-x>, 2023.
